# Supplementary material for: Comparison of Aroma Compounds and Sensory Characteristics between Two Different Types of Rice-Based Baijiu
Source: MDPI journal article supplement (doi:10.3390/foods13050681), 2024-02-23
Supplement: s1 [file s1]

**Table S1.** Compound Quantitative Standard Curve Information Table.

| Compound                | Method     | Retention Time | Quantitative Ion (m/z) | Standard Curve   | R <sup>2</sup> | Concentration Range(μg/L) |
|-------------------------|------------|----------------|------------------------|------------------|----------------|---------------------------|
| ethyl acetate           | GC-FID     | 7.49           | -                      | y=0.9096x+0.0315 | 0.9996         | 262.144-66440.000*        |
| 1-propanol              | GC-FID     | 12.795         | -                      | y=0.9921x+0.006  | 0.9995         | 26.590-851.030*           |
| isobutanol              | GC-FID     | 14.952         | -                      | y=0.854x+0.0053  | 0.9995         | 9.380-300.010*            |
| 3-methyl-1-butanol      | GC-FID     | 19.085         | -                      | y=0.7092x+0.0084 | 0.9994         | 13.460-430.670*           |
| ethyl lactate           | GC-FID     | 23.66          | -                      | y=1.1307x+0.0689 | 0.9966         | 71.690-2293.990*          |
| 1,1-Diethoxyethane      | SPME-GC-MS | 6.274          | 45                     | y=23.189x-94.988 | 0.9935         | 21.703-1388.88            |
| ethyl isobutyrate       | SPME-GC-MS | 7.426          | 71                     | y=87.562x+2.9627 | 0.9945         | 26.67-6828.27             |
| ethyl butyrate          | SPME-GC-MS | 8.555          | 71                     | y=49.301x+1.7781 | 0.9986         | 513.85-6577               |
| ethyl 2-methylbutanoate | SPME-GC-MS | 8.992          | 102                    | y=24.136x+0.2673 | 0.9985         | 0.416-425.9               |
| ethyl isovalerate       | SPME-GC-MS | 9.14           | 88                     | y=18.398x+0.3021 | 0.9936         | 4.134-1058                |
| hexanal                 | SPME-GC-MS | 9.47           | 56                     | y=1.0154x-0.134  | 0.9976         | 67.51-17284               |
| ethyl valerate          | SPME-GC-MS | 10.41          | 57                     | y=49.72x-0.0317  | 0.996          | 3.9-40038                 |
| butanol                 | SPME-GC-MS | 11.125         | 56                     | y=12.853x+2.417  | 0.9923         | 162.41-83153.4            |
| ethyl hexanoate         | SPME-GC-MS | 12.513         | 88                     | y=14.936x+0.2718 | 0.9986         | 33.63-68105               |
| acetoin                 | SPME-GC-MS | 15.25          | 45                     | y=0.2747x-0.0086 | 0.9921         | 20.59-21090               |
| styrene                 | SPME-GC-MS | 13.3           | 104                    | y=0.2663x-0.2411 | 0.9907         | 4.88-50000                |
| ethyl oenanthate        | SPME-GC-MS | 14.76          | 88                     | y=4.2755x+0.1113 | 0.9936         | 24.41-6250                |
| 1-hexanol               | SPME-GC-MS | 15.421         | 55                     | y=25.427x-2.6501 | 0.9954         | 196.74-201465             |
| 2-nonanone              | SPME-GC-MS | 16.197         | 58                     | y=0.2855x-0.066  | 0.9988         | 7.436-3807.5              |
| nonanal                 | SPME-GC-MS | 16.269         | 98                     | y=2.2655x-0.1561 | 0.9939         | 7.79-1998.6               |
| 3-octen-2-one           | SPME-GC-MS | 16.676         | 111                    | y=6.6114x-0.0041 | 0.9995         | 15.625-1000               |
| ethyl caprylate         | SPME-GC-MS | 17.159         | 88                     | y=4.5887x-1.9988 | 0.9987         | 37.65-19277               |
| 1-Heptanol              | SPME-GC-MS | 17.539         | 70                     | y=3.4364x-0.0214 | 0.9974         | 25.56-13089               |
| furfural                | SPME-GC-MS | 18.174         | 96                     | y=59.6x+8.2453   | 0.9949         | 82.95-21237               |

|                         |            |        |     |                        |        |               |
|-------------------------|------------|--------|-----|------------------------|--------|---------------|
| ethyl nonanoate         | SPME-GC-MS | 19.212 | 88  | $y=2.1613x-0.1251$     | 0.9964 | 17.05-8727.75 |
| linalool                | SPME-GC-MS | 19.4   | 121 | $y=2.4273x-1.2006$     | 0.9996 | 3.8-1950      |
| trans-caryophyllene     | SPME-GC-MS | 20.619 | 93  | $y=0.2977x+0.0408$     | 0.9968 | 2.008-257.025 |
| ethyl benzoate          | SPME-GC-MS | 22.17  | 105 | $y=5.0435x-0.1309$     | 0.9965 | 5.8-2969.5    |
| 3-methylbutyl octanoate | SPME-GC-MS | 21.717 | 127 | $y=3.6608x+0.0092$     | 0.9961 | 20.471-5241   |
| diethyl succinate       | SPME-GC-MS | 22.086 | 101 | $y=145.25x-1.4796$     | 0.9939 | 46.03-23569   |
| ethyl undecanoate       | SPME-GC-MS | 23.238 | 88  | $y=0.8464x+0.0142$     | 0.9922 | 0.416-425.9   |
| citronellol             | SPME-GC-MS | 23.75  | 69  | $y=0.174x+0.004$       | 0.9998 | 7.47-956.37   |
| ethyl phenylacetate     | SPME-GC-MS | 24.264 | 91  | $y=5.289x+0.0025$      | 9.9966 | 22.07-5813.5  |
| cis-anethol             | SPME-GC-MS | 25.444 | 104 | $y=0.6408x-25.487$     | 0.9913 | 24.41-6250    |
| phenylethyl acetate     | SPME-GC-MS | 24.845 | 104 | $y=6.0501x+0.1366$     | 0.9939 | 22.07-5813.5  |
| ethyl laurate           | SPME-GC-MS | 25.128 | 88  | $y=1.755x-0.0538$      | 0.9978 | 8.64-4425     |
| benzyl alcohol          | SPME-GC-MS | 25.877 | 79  | $y=118.7x+8.5064$      | 0.9991 | 107.48-55030  |
| ethyl                   | SPME-GC-MS | 26.048 | 104 | $y=3.5418x+0.0778$     | 0.9946 | 14.94-7649    |
| 3-phenylpropanoate      | SPME-GC-MS | 26.538 | 91  | $y=18.201x-2.1329$     | 0.9982 | 98.43-50400   |
| phenethyl alcohol       | SPME-GC-MS | 26.538 | 91  | $y=18.201x-2.1329$     | 0.9982 | 98.43-50400   |
| 2-heptanone             | SPME-GC-MS | 11.559 | 58  | $y = 0.8688x - 0.0239$ | 0.9932 | 1.54-792.4    |
| apricolin               | SPME-GC-MS | 28.591 | 85  | $y=1.6942x+0.009$      | 0.9963 | 3.57-1830     |
| ethyl tetradecanoate    | SPME-GC-MS | 28.5   | 88  | $y=1.7726x+0.0619$     | 0.9959 | 19.53-10000   |
| geranylacetone          | SPME-GC-MS | 25.489 | 69  | $y=0.1756x-0.0226$     | 0.9925 | 3.47-888      |
| 2-amylfuran             | SPME-GC-MS | 12.277 | 81  | $y=0.3848x+0.2014$     | 0.9992 | 1.95-2000     |
| 3-octenol               | SPME-GC-MS | 17.402 | 57  | $y=1.0232x+0.0277$     | 0.9988 | 14.02-1794    |
| ethyl DI-leucate        | SPME-GC-MS | 19.45  | 104 | $y=1746.4x+0.3136$     | 0.9983 | 15.5-7950     |
| acetophenone            | SPME-GC-MS | 21.911 | 105 | $Y=13.258x-4.589$      | 0.9909 | 2.28-585      |
| isobutyric acid         | SPME-GC-MS | 20.086 | 88  | $y=506.37x+13.015$     | 0.9973 | 2.86718-367*  |
| 2-methylbutyric acid    | SPME-GC-MS | 22.059 | 60  | $y=860.94x+0.7899$     | 0.9969 | 2.13-273.80*  |

|                         |                      |        |     |                        |        |               |
|-------------------------|----------------------|--------|-----|------------------------|--------|---------------|
| isoamyl acetate         | SPME-GC-MS           | 10.23  | 70  | $y=0.1823x-0.5192$     | 0.9954 | 19.53-10000   |
| benzaldehyde            | SPME-GC-MS           | 19.509 | 106 | $y = 1.3913x - 0.4087$ | 0.9942 | 5.85-749.86   |
| 4-ethylphenol           | SPME-GC-MS           | 30.679 | 107 | $y = 3.5258x - 0.4433$ | 0.9984 | 6.21-3182.19  |
| octanoic acid           | LLME-GC-MS           | 29.306 | 73  | $y=168.38x+19.605$     | 0.9949 | 2.35-301.40*  |
| propionic acid          | LLME-GC-MS           | 19.687 | 57  | $y=404.99x-0.278$      | 0.9964 | 122.26-15650  |
| 1-hexanoic acid         | LLME-GC-MS           | 25.162 | 60  | $y=94.386x+21.629$     | 0.995  | 2.81-360.80*  |
| acetic acid             | LLME-GC-MS           | 17.885 | 60  | $y=43.849x+16.104$     | 0.9975 | 1.65-211.760* |
| (2E)-2-Nonenal          | SPME-GC×GC-TOF<br>MS | -      | 83  | $y=11.970x+0.0345$     | 0.9931 | 4.19-134.20   |
| (2E,4E)-Deca-2,4-dienal | SPME-GC×GC-TOF<br>MS | -      | 81  | $y=7.7726x+0.0152$     | 0.9973 | 3.57-57.125   |
| (2E)-2-Octenal          | SPME-GC×GC-TOF<br>MS | -      | 83  | $y=24.552x-0.0408$     | 0.9948 | 3.91-2000     |
| trans-2-Undecen-1-al    | SPME-GC×GC-TOF<br>MS | -      | 70  | $y=1.5511x-0.0078$     | 0.9963 | 3.91-500      |
| (2E)-2-Decenal          | SPME-GC×GC-TOF<br>MS | -      | 70  | $y=1.6879x-0.1002$     | 0.9957 | 3.48-445      |

---

\* The concentration unit is mg/L. - Determine based on RI.

**Table S2.** Specific Explanation and Reference of Sensory Descriptors.

| Number | Descriptor    | Descriptor Definition                            | Reference                                                                                            | Score* |
|--------|---------------|--------------------------------------------------|------------------------------------------------------------------------------------------------------|--------|
| 1      | Fruity aroma  | Aroma of ripe fruit                              | 10 mg/L ethyl hexanoate and 5 mg/L isoamyl acetate in 40% ethanol aqueous solution                   | 9      |
| 2      | Flower aroma  | Floral-like aroma                                | 10 mg/L phenylethyl acetate and 10 mg/L $\beta$ -phenylethyl alcohol in 40% ethanol aqueous solution | 9      |
| 3      | Plant aroma   | Plant-like aromas such as trees and herbs        | Le Nez du Vin Cedor and Green Pepper                                                                 | 9      |
| 4      | Roasted aroma | An aroma similar to the smell of toasting bread. | Real toast                                                                                           | 9      |
| 5      | Oily aroma    | Oil-like aroma                                   | Chi-flavored Baijiu                                                                                  | 9      |
| 6      | Sweet aroma   | Suger-like and Honey-like aroma                  | 250 $\mu$ g/L $\beta$ -damascenone and 100 $\mu$ g/L apricolin in 40% ethanol aqueous solution       | 9      |
| 7      | Rice aroma    | Aroma similar to the taste of cooked rice        | Cooked rice                                                                                          | 9      |
| 8      | Sour aroma    | Vinegar-like aroma                               | Real vinegar                                                                                         | 9      |
| 9      | Sweetness     | Sweetness in Baijiu                              | 10 g/L edible sucrose in 40% ethanol aqueous solution                                                | -      |
| 10     | Stimulation   | Burning sensation when drinking Baijiu           | 40% ethanol aqueous solution                                                                         | -      |
| 11     | Bitterness    | Bitterness of Baijiu                             | Bitter gourd juice                                                                                   | -      |

\* Maximum intensity value of sensory descriptors. - No sensory intensity values.

**Table S3.** Concentrations of aroma compounds.

| Aroma compound          | Concentration (µg/L) |                    |                |                    |                    |                    | Statistical significance <sup>a</sup> |                       |
|-------------------------|----------------------|--------------------|----------------|--------------------|--------------------|--------------------|---------------------------------------|-----------------------|
|                         | Q40                  | R40-1              | R40-2          | Q50                | R50-1              | R50-2              | Group p 40 <sup>b</sup>               | Group 52 <sup>c</sup> |
| Esters                  |                      |                    |                |                    |                    |                    |                                       |                       |
| ethyl lactate           | 364172.64±0.0<br>1   | 391353.97±0.0<br>1 | 371178.82±0.01 | 359458.78±0.0<br>1 | 252843.25±0.0<br>1 | 517494.43±0.0<br>0 | -                                     | -                     |
| ethyl acetate           | 253492.78±0.0<br>1   | 151613.84±0.0<br>9 | 400313.54±0.03 | 250940.30±0.0<br>0 | 158992.29±0.1<br>0 | 475677.91±0.0<br>3 | -                                     | -                     |
| diethyl succinate       | 4631.55±0.20         | 6520.46±0.15       | 6615.88±0.15   | 4992.04±0.47       | 11541.66±0.17      | 15309.63±0.13      | -                                     | *                     |
| ethyl isobutyrate       | 1079.91±0.33         | 4934.96±0.06       | 3729.72±0.07   | 530.90±0.32        | 3263.12±0.20       | 5907.72±0.11       | *                                     | *                     |
| ethyl hexanoate         | 471.31±0.08          | 412.50±0.06        | 223.54±0.11    | 469.42±0.05        | 453.87±0.05        | 375.66±0.06        | -                                     | -                     |
| ethyl caprylate         | 871.71±0.08          | 1626.57±0.04       | 916.65±0.07    | 1610.48±0.11       | 1895.05±0.33       | 2458.44±0.26       | -                                     | -                     |
| ethyl butyrate          | 685.73±0.16          | 1299.11±0.02       | 460.45±0.05    | 738.92±0.11        | 1010.07±0.23       | 784.52±0.29        | *                                     | -                     |
| ethyl DL-leucate        | 2759.27±0.04         | 3763.32±0.02       | 1952.32±0.04   | 2042.97±0.07       | 4096.85±0.97       | 10789.18±0.37      | *                                     | -                     |
| ethyl laurate           | 486.19±0.01          | 58.79±0.58         | 393.99±0.09    | 785.50±0.06        | 768.82±0.25        | 890.90±0.22        | *                                     | -                     |
| ethyl tetradecanoate    | 352.66±0.01          | 35.26±0.71         | 226.84±0.11    | 1217.76±0.12       | 1049.42±0.11       | 1244.87±0.09       | *                                     | -                     |
| ethyl valerate          | 178.40±0.02          | 132.22±0.01        | 14.12±0.11     | 164.40±0.05        | 61.84±0.06         | 50.97±0.07         | *                                     | *                     |
| ethyl isovalerate       | 100.90±0.20          | 290.08±0.05        | 273.82±0.06    | 89.55±0.81         | 328.24±0.24        | 450.68±0.18        | *                                     | *                     |
| ethyl nonanoate         | 95.15±0.02           | 12.84±0.00         | 0.05±0.60      | 145.69±0.03        | 34.52±0.09         | 20.70±0.15         | *                                     | *                     |
| isoamyl acetate         | 587.60±0.37          | 921.63±0.18        | 651.55±0.26    | 776.80±0.23        | 1631.31±0.23       | 1924.70±0.19       | -                                     | *                     |
| ethyl 2-methylbutanoate | 82.33±0.14           | 292.31±0.03        | 138.16±0.06    | 75.51±0.57         | 291.51±0.12        | 273.64±0.13        | *                                     | *                     |
| ethyl benzoate          | 68.24±0.00           | 1.42±1.42          | 6.55±0.31      | 80.41±0.02         | 12.87±0.18         | 16.28±0.14         | *                                     | *                     |
| ethyl oenanthate        | 63.51±0.01           | 29.27±0.10         | 16.26±0.19     | 54.32±0.04         | 29.47±0.11         | 25.69±0.12         | *                                     | *                     |

|                             |                    |                    |                |                    |                    |                    |   |   |
|-----------------------------|--------------------|--------------------|----------------|--------------------|--------------------|--------------------|---|---|
| 3-methylbutyl<br>octanoate  | 14.16±0.08         | 8.23±0.32          | 12.73±0.20     | 30.67±0.11         | 33.09±0.15         | 39.30±0.13         | - | - |
| ethyl<br>3-phenylpropanoate | 13.76±0.14         | 10.49±0.07         | 8.85±0.09      | 17.44±0.10         | 14.51±0.14         | 23.47±0.09         | - | - |
| ethyl undecanoate           | 6.08±0.02          | 2.12±0.19          | 2.57±0.16      | 10.72±0.25         | 7.17±0.10          | 5.35±0.13          | * | * |
| Alcohols                    |                    |                    |                |                    |                    |                    |   |   |
| isobutanol                  | 343119.22±0.0<br>0 | 134259.39±0.0<br>4 | 362224.79±0.02 | 448309.47±0.0<br>5 | 579391.00±0.2<br>8 | 432160.52±0.3<br>7 | - | - |
| 1-propanol                  | 200727.63±0.0<br>2 | 109087.05±0.0<br>3 | 109097.17±0.03 | 210167.50±0.0<br>2 | 159222.88±0.0<br>8 | 175486.26±0.0<br>7 | * | * |
| 3-methyl-1-butanol          | 102882.35±0.0<br>5 | 189912.34±0.0<br>4 | 267994.52±0.03 | 144656.84±0.0<br>4 | 162692.15±0.0<br>2 | 122309.29±0.0<br>3 | - | - |
| butanol                     | 8402.35±0.25       | 11665.58±0.06      | 3749.91±0.17   | 11146.38±0.09      | 10715.05±0.16      | 15496.95±0.11      | * | - |
| 1-hexanol                   | 994.87±0.13        | 442.72±0.10        | 272.57±0.17    | 1470.82±0.02       | 395.38±0.04        | 320.49±0.04        | * | * |
| 1-heptanol                  | 167.46±0.06        | 53.14±0.01         | 6.65±0.10      | 200.83±0.03        | 61.57±0.14         | 120.25±0.07        | * | * |
| 3-octenol                   | 76.55±0.02         | 78.40±0.04         | 35.68±0.09     | 41.77±0.14         | 122.39±0.08        | 84.17±0.11         | - | * |
| Aldehydes                   |                    |                    |                |                    |                    |                    |   |   |
| 1,1-Diethoxyethane          | 976.41±0.05        | 393.55±0.17        | 1074.30±0.06   | 1000.84±0.14       | 1078.64±0.06       | 1105.97±0.06       | - | - |
| hexanal                     | 688.39±0.02        | 59.62±0.10         | 43.80±0.13     | 243.52±0.06        | 93.07±0.32         | 123.95±0.24        | * | * |
| nonanal                     | 94.93±0.03         | 13.94±0.05         | 9.76±0.07      | 41.39±0.08         | 27.87±0.30         | 28.74±0.29         | * | * |
| (2E)-2-Nonenal              | 41.02±0.00         | 19.14±0.00         | 0.00±0.00      | 26.96±0.00         | 0.00±0.00          | 0.00±0.00          | * | * |
| (2E,4E)-Deca-2,4-di<br>enal | 107.10±0.00        | 3.24±0.39          | 15.09±0.08     | 303.35±0.00        | 24.99±0.03         | 16.65±0.05         | * | * |
| (2E)-2-Octenal              | 271.25±0.02        | 157.64±0.00        | 14.54±0.03     | 119.96±0.66        | 180.79±0.00        | 0.00±0.00          | * | - |
| trans-2-Undecen-1-a<br>l    | 64.65±0.00         | 0.00±0.00          | 16.65±0.04     | 5.94±0.29          | 14.14±0.00         | 0.00±0.00          | * | * |
| (2E)-2-Decenal              | 56.31±0.00         | 0.00±0.00          | 18.33±0.08     | 0.00±0.00          | 14.35±0.03         | 11.85±0.04         | * | * |

|                      |                |               |                |                |                |                |   |   |
|----------------------|----------------|---------------|----------------|----------------|----------------|----------------|---|---|
| Ketones              |                |               |                |                |                |                |   |   |
| acetoin              | 136.71±0.08    | 117.62±0.19   | 352.93±0.06    | 188.34±0.06    | 143.70±0.41    | 598.95±0.10    | - | - |
| 3-octen-2-one        | 52.94±0.00     | 0.00±0.00     | 0.00±0.00      | 51.99±0.00     | 0.00±0.00      | 0.00±0.00      | * | * |
| 2-heptanone          | 52.64±0.00     | 7.31±0.02     | 4.02±0.03      | 11.99±0.41     | 10.43±0.08     | 10.30±0.08     | * | - |
| 2-nonanone           | 9.76±0.00      | 0.00±0.00     | 0.00±0.00      | 1.43±0.00      | 0.00±0.00      | 0.00±0.00      | * | * |
| Acids                |                |               |                |                |                |                |   |   |
| acetic acid          | 126317.48±0.01 | 68044.44±0.14 | 162072.93±0.06 | 134998.52±0.07 | 105664.42±0.07 | 147458.99±0.05 | - | - |
| 1-hexanoic acid      | 15530.95±0.00  | 854.39±0.24   | 2720.32±0.07   | 13087.64±0.00  | 826.50±0.03    | 717.73±0.03    | - | * |
| 2-methylbutyric acid | 7011.18±0.03   | 5896.63±0.02  | 4860.16±0.03   | 3866.02±0.01   | 7236.08±0.00   | 4904.07±0.00   | * | * |
| propionic acid       | 1745.73±0.02   | 1232.59±0.02  | 429.25±0.06    | 3784.20±0.02   | 3343.86±0.00   | 4610.24±0.00   | * | * |
| isobutyric acid      | 1740.04±0.13   | 1967.03±0.03  | 1332.24±0.04   | 1537.98±0.06   | 2673.75±0.08   | 1933.07±0.11   | - | - |
| octanoic acid        | 1302.98±0.06   | 976.36±0.02   | 1190.27±0.02   | 935.92±0.01    | 883.38±0.05    | 1290.53±0.04   | - | - |
| Terpenes             |                |               |                |                |                |                |   |   |
| cis-anethol          | 4.23±0.00      | 0.00±0.00     | 0.00±0.00      | 40.92±0.00     | 0.00±0.00      | 0.00±0         | * | * |
| citronellol          | 27.12±0.14     | 21.12±0.49    | 28.38±0.36     | 34.74±0.05     | 33.97±0.07     | 27.46±0.09     | - | - |
| linalool             | 25.46±0.08     | 45.57±0.14    | 19.41±0.32     | 28.83±0.03     | 9.75±0.35      | 21.70±0.16     | - | * |
| trans-caryophyllene  | 5.78±0.03      | 3.98±0.40     | 9.11±0.18      | 8.63±0.17      | 10.31±0.48     | 12.94±0.38     | - | - |
| geranylacetone       | 5.39±0.02      | 0.83±0.50     | 0.87±0.48      | 5.24±0.32      | 4.10±0.36      | 7.38±0.20      | * | - |
| Aromatic             |                |               |                |                |                |                |   |   |
| phenethyl alcohol    | 28074.17±1.25  | 47438.75±0.59 | 37999.53±0.74  | 19334.32±1.26  | 50933.12±0.09  | 51562.43±0.09  | - | * |
| benzyl alcohol       | 58.46±0.01     | 26.08±0.05    | 26.19±0.05     | 61.64±0.04     | 36.29±0.08     | 33.43±0.08     | * | * |
| acetophenone         | 46.82±0.01     | 5.86±0.15     | 21.30±0.04     | 32.35±0.07     | 25.46±0.16     | 18.05±0.22     | - | * |
| styrene              | 13.54±0.00     | 0.00±0.00     | 0.00±0.00      | 78.30±0.00     | 0.00±0.00      | 0.00±0.00      | * | * |
| benzaldehyde         | 127.89±0.02    | 7.30±0.27     | 17.86±0.11     | 153.14±0.01    | 53.35±0.08     | 72.73±0.06     | * | * |
| 4-ethylphenol        | 24.84±0.21     | 142.02±0.02   | 6.37±0.48      | 46.89±0.09     | 232.95±0.03    | 41.62±0.15     | * | - |

|                     |              |             |             |              |             |              |   |   |
|---------------------|--------------|-------------|-------------|--------------|-------------|--------------|---|---|
| phenylethyl acetate | 107.21±0.12  | 70.60±0.21  | 74.79±0.20  | 158.19±0.31  | 201.24±0.10 | 128.67±0.16  | * | - |
| ethyl phenylacetate | 57.67±0.07   | 20.16±1.16  | 256.45±0.09 | 70.20±0.24   | 66.04±0.33  | 112.05±0.20  | * | - |
| Others              |              |             |             |              |             |              |   |   |
| furfural            | 1221.50±0.03 | 512.96±0.06 | 566.66±0.05 | 1461.55±0.07 | 645.23±0.06 | 1349.59±0.03 | * | - |
| apricolin           | 159.78±0.07  | 81.13±0.00  | 56.56±0.00  | 163.67±0.04  | 88.49±0.03  | 33.53±0.07   | * | * |
| 2-amylfuran         | 95.48±0.00   | 19.45±0.01  | 24.45±0.01  | 60.92±0.12   | 43.44±0.29  | 29.60±0.42   | * | * |

<sup>a</sup> Differences in substance concentration between two groups of Qingya-flavored Baijiu and traditional Rice-flavored Baijiu. <sup>b</sup> Team of Q40, R40-1 and R40-2. <sup>c</sup> Team of Q50, R50-1 and R50-2. \* Substances with statistical significance. - Substances without statistical significance.
